# Supplementary material for: Renal Ischemia Tolerance Mediated by eIF5A Hypusination Inhibition Is Regulated by a Specific Modulation of the Endoplasmic Reticulum Stress
Source: MDPI journal article supplement (doi:10.3390/cells12030409), 2023-01-25
Supplement: s1 [file s1]

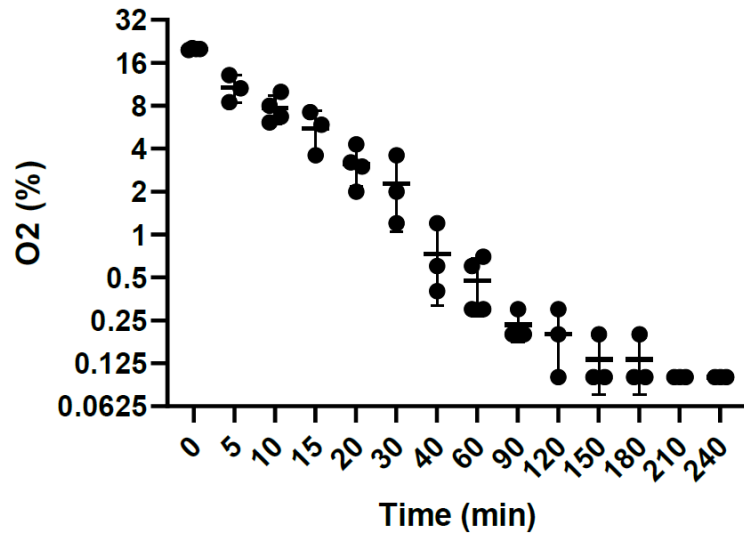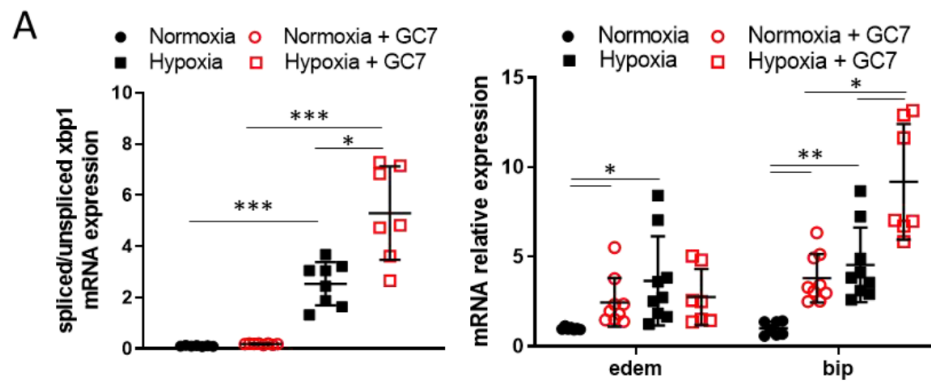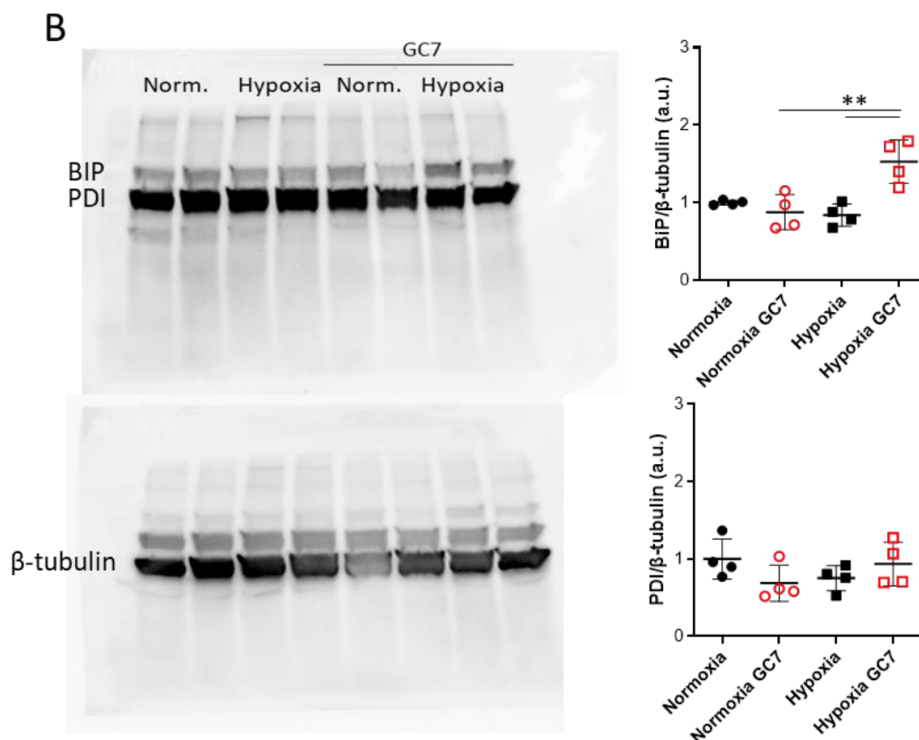

**Supplementary figure S2:** GC7 increases XBP1 splicing and BIP expression under mild hypoxia. PCT cells pretreated for 8 hours either with a vehicle or with 30  $\mu$ M GC7 and 24 hours later, exposed to normoxia or mild hypoxia (1% O<sub>2</sub>) for 24h. At the end of the experiment, mRNA (A) and protein (B) expressions were measured. A) Scatter plot representation of individual values along with mean  $\pm$  SD for *bip*, *edem* and the ratio spliced/unsliced *xbp1* mRNA. B) Representative western blots of BiP and PDI protein levels along with the scatter plot representation of individual values with mean  $\pm$  SD for respective blots. \* =  $p \leq 0.01$ ; \*\* =  $p \leq 0.001$ ; \*\*\* =  $p \leq 0.0001$ .

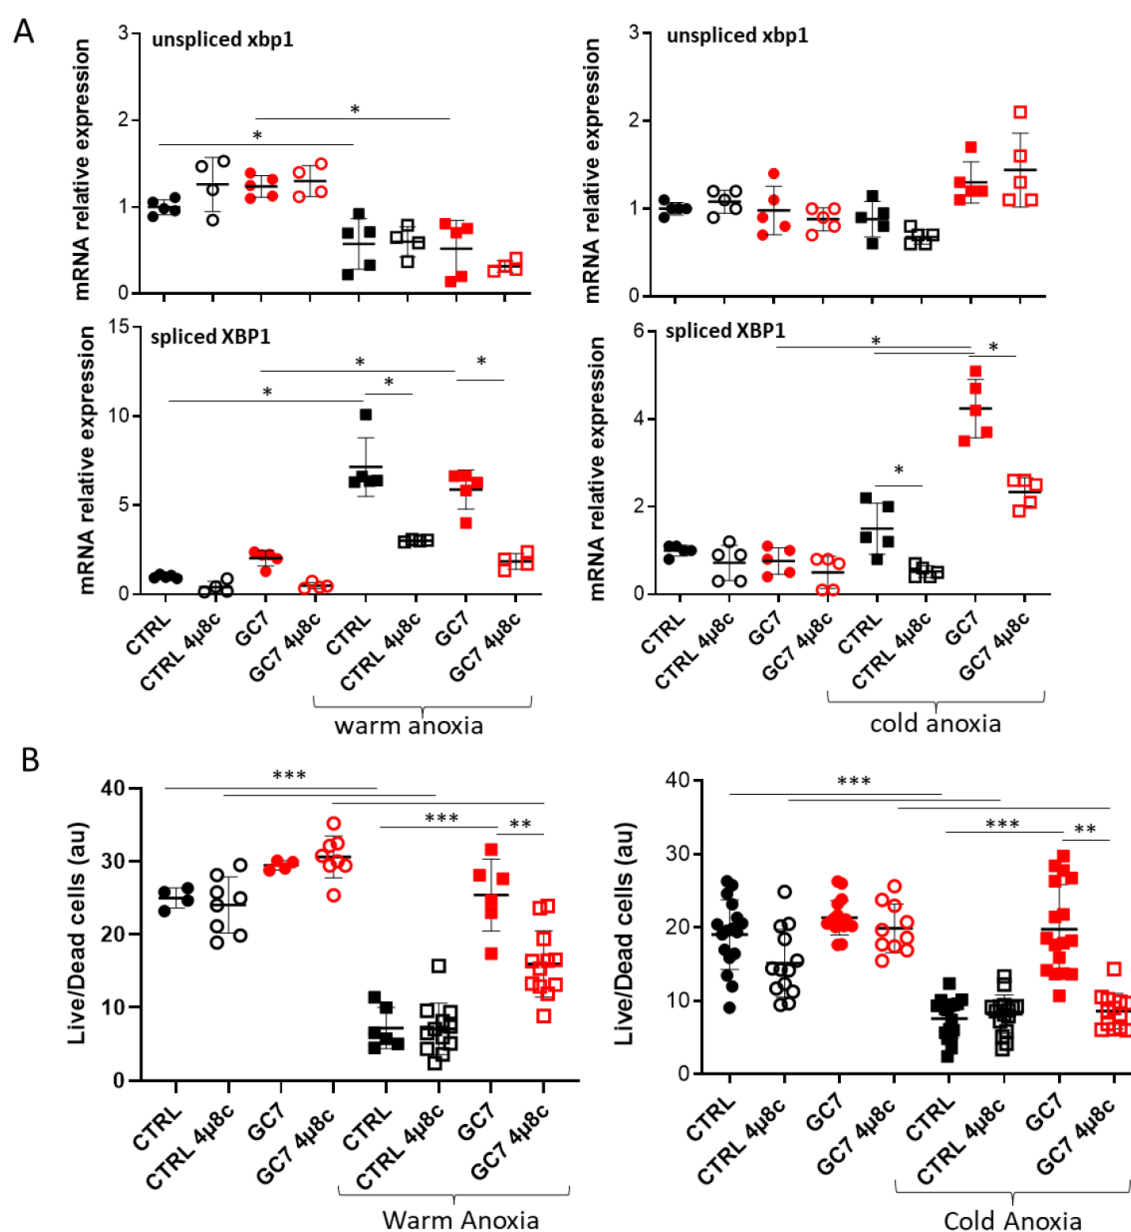

**Supplementary figure S3:** Impact of 4 $\mu$ 8c treatment on survival and splicing of XBP1. PCT cells pretreated for 8 hours either with a vehicle or with 30  $\mu$ M GC7 and 24 hours later, exposed to either warm anoxia ( $\leq 0.1\%$  O<sub>2</sub> at 37°C for 24h) or cold anoxia ( $\leq 0.1\%$  O<sub>2</sub>, 4°C, for 16 h), in presence or not of 1 $\mu$ M IRE-1 $\alpha$  inhibitors, 4 $\mu$ 8c. At the end of the experiment, (A) mRNA expressions of spliced and unspliced *xbp1* were determined and used to calculate the ratio displayed in Figure 6, and (B) cell viability was evaluated using a live/dead fluorescence assay to evaluate survival rate displayed in figure 5. Scatter plot representation of individual values along with mean  $\pm$  SD. \* =  $p \leq 0.01$ ; \*\* =  $p \leq 0.001$ ; \*\*\* =  $p \leq 0.0001$ .
